# Supplementary material for: Effect of Hermetia illucens Fat, Compared with That of Soybean Oil and Palm Oil, on Hepatic Lipid Metabolism and Plasma Metabolome in Healthy Rats
Source: MDPI journal article supplement (doi:10.3390/ani13213356), 2023-10-29
Supplement: s1 [file s1]

## Supplementary file

**Table S1** Performance characteristics of gene-specific primers used for qPCR.

| Gene symbol            | Primer forward (von 5` nach 3`)<br>Primer reverse (von 5` nach 3`) | PCR product size (bp) | NCBI<br>GeneBank |
|------------------------|--------------------------------------------------------------------|-----------------------|------------------|
| <i>Reference genes</i> |                                                                    |                       |                  |
| <i>Canx</i>            | CCAGATGCAGATCTGAAGAC<br>CTGGGTCCTCAATTTACGT                        | 175                   | NM_172008        |
| <i>Mdh1</i>            | CAGACAAAGAAGAGGTTGCC<br>CGTCAGGCAGTTTGTATTGG                       | 206                   | NM_033235        |
| <i>Rpl13</i>           | CTTAAATTGGCCACGCAGCT<br>CTTCTCAACGTCTTGCTCTG                       | 198                   | NM_031101        |
| <i>Sdha</i>            | GCCTCCGTGGTTGAGCTAGAA<br>CGACACAGCAACACCGATGG                      | 136                   | NM_130428        |
| <i>Target genes</i>    |                                                                    |                       |                  |
| <i>Acaca</i>           | TACAACGCAGGCATCAGAAG<br>TGTGCTGCAGGAAGATTGAC                       | 244                   | NM_022193        |
| <i>Acly</i>            | TCAGTCCCAAGTCCAAGATCCC<br>ACGGGTAGACCATAGCAGCC                     | 166                   | NM_016987        |
| <i>Acox1</i>           | CTCAGCAGGAGAAATGGATGCG<br>TCCTTGAGTGATGAGCTGAGCC                   | 239                   | NM_017340        |
| <i>Cpt1a</i>           | ACCGCCATCTCTTCTGCCTC<br>CTGCTGAGGAGTCTGGCTCG                       | 116                   | NM_031559        |
| <i>Crp</i>             | AGCTTTGGCTTGACGGGAAAC<br>CTCCCACCAGACTGATTGCG                      | 139                   | NM_017096        |
| <i>Elovl5</i>          | ATGAACTGGGTTCCCTGCGG<br>GGAAGGGACAGAGGACAGGC                       | 102                   | NM_134382        |

|              |                                                  |     |           |
|--------------|--------------------------------------------------|-----|-----------|
| <i>Gpam</i>  | CAGCGTGATTGCTACCTGAA<br>CTCTCCGTCCTGGTGAGAAG     | 194 | NM_017274 |
| <i>G6pd</i>  | TTGTACCAGGGTGATGCCTTCC<br>GCTCACTCTGTTTGCGGATGTC | 199 | NM_017006 |
| <i>Hmgcr</i> | TGGCAGGACGCAACCTCTAC<br>GGCAGCAGGTTTCTTGTCGG     | 173 | NM_013134 |
| <i>Icam1</i> | CTCCAATGGCTTCAACCCGTG<br>ATACCTGAGCACCGACAGGC    | 93  | NM_012967 |
| <i>Il1b</i>  | AGTTGACTTCACCATGGAACCCG<br>ACAATGCTGCCTCGTGACCC  | 298 | NM_031512 |
| <i>Ldlr</i>  | ACAGTGTCCTCAAGTCCAA<br>GCAAATGTGGATCTCGTCCTC     | 222 | NM_175762 |
| <i>Scd1</i>  | GTACTACAAGCCTGGCCTC<br>CACCCAGGGAAACCAGGAT       | 227 | NM_139192 |
| <i>Tnf</i>   | CCACCAAGCGGAGGAGCAGC<br>TCGGCTGACGGTGTGGGTGA     | 187 | NM_012675 |

---

**Table S2** Concentrations of altered plasma metabolites in lean Zucker rats fed semi-synthetic diets with either soybean oil (SO), palm oil (PO) or *Hermetia* fat (HF) as the main fat source for 4 weeks.

| Class              | Metabolite     | SO                | PO                | HF                | P-value  | FDR      |
|--------------------|----------------|-------------------|-------------------|-------------------|----------|----------|
| Fatty Acids        | FA(12:0)       | <LOD c            | 42.8 ± 15.8 b     | 62.9 ± 16.4 a     | 3.90E-19 | 7.61E-17 |
| Triacylglycerols   | TG(18:3 36:4)  | 9.22 ± 2.27 a     | 0.532 ± 0.182 c   | 0.866 ± 0.293 b   | 2.16E-18 | 3.17E-16 |
| Triacylglycerols   | TG(18:2 36:5)  | 16.5 ± 4.3 a      | 0.959 ± 0.401 c   | 1.9 ± 0.61 b      | 5.78E-17 | 5.63E-15 |
| Triacylglycerols   | TG(18:2 36:4)  | 83.4 ± 19.5 a     | 6.73 ± 3.27 c     | 11 ± 3.3 b        | 5.23E-16 | 4.37E-14 |
| Triacylglycerols   | TG(18:0 30:0)  | <LOD c            | 0.794 ± 0.487 b   | 1.18 ± 0.42 a     | 5.80E-15 | 4.24E-13 |
| Triacylglycerols   | TG(18:1 26:0)  | 0.316 c           | 1.35 ± 1.16 b     | 7.64 ± 3.52 a     | 3.68E-14 | 2.16E-12 |
| Diacylglycerols    | DG(18:2 18:2)  | 11.8 ± 2.3 a      | 2.05 ± 0.72 c     | 3.34 ± 0.77 b     | 4.65E-14 | 2.27E-12 |
| Triacylglycerols   | TG(22:2 32:4)  | 0.0817 ± 0.0171 a | 0.0121 ± 0.0057 c | 0.0158 ± 0.0043 b | 4.64E-14 | 2.27E-12 |
| Triacylglycerols   | TG(20:4 36:5)  | 3.42 ± 1.2 a      | 0.275 ± 0.15 c    | 0.615 ± 0.166 b   | 8.94E-14 | 4.02E-12 |
| PC                 | PC ae C30:0    | 0.121 ± 0.014 c   | 0.158 ± 0.017 b   | 0.267 ± 0.036 a   | 1.07E-13 | 4.22E-12 |
| Triacylglycerols   | TG(16:0 30:2)  | 0.439 ± 0.234 c   | 4.87 ± 3.57 b     | 14.9 ± 5.9 a      | 1.08E-13 | 4.22E-12 |
| Triacylglycerols   | TG(18:2 28:0)  | 0.335 ± 0.13 c    | 3.76 ± 3.14 b     | 14.4 ± 6 a        | 1.45E-13 | 5.30E-12 |
| PC                 | PC aa C30:0    | 0.979 ± 0.131 c   | 1.48 ± 0.27 b     | 3.03 ± 0.72 a     | 6.62E-13 | 2.28E-11 |
| Triacylglycerols   | TG(18:0 30:1)  | 0.203 ± 0.042 c   | 1.22 ± 0.89 b     | 2.3 ± 0.91 a      | 7.15E-13 | 2.32E-11 |
| Triacylglycerols   | TG(16:0 28:1)  | 0.352 ± 0.054 c   | 1.77 ± 1.28 b     | 6.05 ± 3.07 a     | 1.58E-12 | 4.86E-11 |
| Cholesterol Esters | CE(14:0)       | 3.58 ± 0.86 c     | 5.5 ± 1.68 b      | 13.5 ± 2.3 a      | 1.93E-12 | 5.64E-11 |
| Triacylglycerols   | TG(16:1 28:0)  | 0.238 ± 0.024 c   | 1.09 ± 0.98 b     | 5.67 ± 2.51 a     | 2.76E-12 | 7.68E-11 |
| Triacylglycerols   | TG(20:4 36:4)  | 17.6 ± 5.8 a      | 1.97 ± 1.07 c     | 3.6 ± 1.25 b      | 5.54E-12 | 1.47E-10 |
| Triacylglycerols   | TG(20:4 30:0)  | 0.421 ± 0.181 c   | 1.04 ± 0.52 b     | 3.37 ± 0.88 a     | 7.57E-12 | 1.93E-10 |
| Triacylglycerols   | TG(20:5 36:3)  | 4.49 ± 1.78 a     | 0.66 ± 0.262 c    | 1.28 ± 0.33 b     | 1.88E-11 | 4.58E-10 |
| Triacylglycerols   | TG(18:1 30:1)  | 1.32 ± 0.86 b     | 18.3 ± 12.2 a     | 28.3 ± 16.4 a     | 1.96E-11 | 4.58E-10 |
| Triacylglycerols   | TG(18:1 28:1)  | 0.248 ± 0.069 c   | 1.52 ± 0.98 b     | 4.39 ± 2.36 a     | 2.83E-11 | 6.14E-10 |
| Triacylglycerols   | TG(20:3 36:5)  | 0.214 ± 0.066 a   | <LOD b            | 0.13 ± 0.011 b    | 2.78E-11 | 6.14E-10 |
| Triacylglycerols   | TG(17:0 32:1)  | 0.336 c           | 0.489 ± 0.208 b   | 0.775 ± 0.37 a    | 3.24E-11 | 6.77E-10 |
| Triacylglycerols   | TG(18:3 36:3)  | 14.3 ± 4.1 a      | 2.21 ± 0.9 c      | 3.44 ± 1.79 b     | 3.75E-11 | 7.56E-10 |
| LysoPC             | lysoPC a C20:3 | 3.21 ± 0.44 b     | 9.2 ± 2.41 a      | 9.11 ± 2.72 a     | 5.15E-11 | 1.00E-09 |
| PC                 | PC ae C42:1    | 0.808 ± 0.132 a   | 0.362 ± 0.051 c   | 0.441 ± 0.084 b   | 7.87E-11 | 1.49E-09 |

|                    |               |                 |                   |                 |          |          |
|--------------------|---------------|-----------------|-------------------|-----------------|----------|----------|
| Triacylglycerols   | TG(20:2 36:5) | 0.302 ± 0.087 a | 0.0614 ± 0.0244 c | 0.131 ± 0.044 b | 8.26E-11 | 1.51E-09 |
| Triacylglycerols   | TG(18:2 30:1) | 1.12 ± 0.61 c   | 4.95 ± 3.1 b      | 13.1 ± 5.6 a    | 9.85E-11 | 1.75E-09 |
| Triacylglycerols   | TG(18:1 30:2) | 0.509 ± 0.154 c | 3.64 ± 2.59 b     | 10.5 ± 4.5 a    | 1.21E-10 | 2.02E-09 |
| PC                 | PC aa C34:1   | 38.6 ± 8 b      | 98.3 ± 15.9 a     | 85.4 ± 24.7 a   | 2.65E-10 | 4.30E-09 |
| PC                 | PC aa C32:1   | 4.72 ± 1.54 c   | 13.2 ± 4.1 b      | 19.4 ± 7 a      | 3.30E-10 | 5.21E-09 |
| Triacylglycerols   | TG(18:0 36:5) | 2.15 ± 0.64 a   | 0.424 ± 0.166 c   | 0.671 ± 0.232 b | 3.59E-10 | 5.52E-09 |
| Triacylglycerols   | TG(18:1 36:5) | 13 ± 3.7 a      | 2.76 ± 1.02 c     | 4.79 ± 1.98 b   | 3.99E-10 | 5.99E-09 |
| Triacylglycerols   | TG(18:2 38:6) | 9.9 ± 3.35 a    | 1.61 ± 0.85 c     | 3.61 ± 1 b      | 5.91E-10 | 8.65E-09 |
| Triacylglycerols   | TG(18:2 34:4) | 2.32 ± 0.89 a   | 0.501 ± 0.171 c   | 1.24 ± 0.43 b   | 7.22E-10 | 1.03E-08 |
| Triacylglycerols   | TG(20:3 32:0) | 0.36 ± 0.126 b  | 1.71 ± 0.88 a     | 2 ± 0.95 a      | 8.44E-10 | 1.18E-08 |
| Triacylglycerols   | TG(17:0 36:4) | 1.19 ± 0.29 a   | 0.297 ± 0.142 c   | 0.511 ± 0.176 b | 1.05E-09 | 1.43E-08 |
| PC                 | PC aa C28:1   | 0.337 ± 0.053 c | 0.452 ± 0.057 b   | 0.649 ± 0.099 a | 1.28E-09 | 1.70E-08 |
| Triacylglycerols   | TG(16:1 30:1) | 0.685 ± 0.304 c | 2.8 ± 2.4 b       | 7.12 ± 4.22 a   | 1.53E-09 | 1.95E-08 |
| Triacylglycerols   | TG(18:1 30:0) | 2.1 ± 1.43 b    | 19.1 ± 15.4 a     | 23.4 ± 12.2 a   | 1.53E-09 | 1.95E-08 |
| Fatty Acids        | EPA           | 1.28 ± 0.52 a   | 0.34 ± 0.107 b    | 0.439 ± 0.087 b | 1.71E-09 | 2.11E-08 |
| Triacylglycerols   | TG(20:3 32:1) | 0.579 ± 0.347 c | 2.48 ± 1.22 b     | 4.19 ± 1.97 a   | 1.73E-09 | 2.11E-08 |
| Triacylglycerols   | TG(18:2 35:3) | 0.853 ± 0.198 a | 0.21 ± 0.09 c     | 0.387 ± 0.135 b | 1.79E-09 | 2.13E-08 |
| Triacylglycerols   | TG(22:5 32:1) | 1.05 ± 0.54 c   | 2.46 ± 0.83 b     | 5.75 ± 2.04 a   | 2.77E-09 | 3.24E-08 |
| Triacylglycerols   | TG(20:3 34:1) | 3.02 ± 1.54 b   | 13 ± 5.7 a        | 17.6 ± 8.7 a    | 2.97E-09 | 3.41E-08 |
| Triacylglycerols   | TG(18:2 33:2) | 2.6 ± 0.72 a    | 0.672 ± 0.33 c    | 1.24 ± 0.38 b   | 4.17E-09 | 4.61E-08 |
| Triacylglycerols   | TG(14:0 36:1) | 0.606 ± 0.231 b | 3.39 ± 2.43 a     | 4.36 ± 2.11 a   | 4.35E-09 | 4.72E-08 |
| Triacylglycerols   | TG(14:0 36:2) | 3.28 ± 2.22 b   | 21.5 ± 15.3 a     | 29.3 ± 15.4 a   | 4.54E-09 | 4.74E-08 |
| Triacylglycerols   | TG(18:1 34:1) | 87.2 ± 50.8 b   | 543 ± 330 a       | 547 ± 300 a     | 4.53E-09 | 4.74E-08 |
| Triacylglycerols   | TG(18:3 38:6) | 1.28 ± 0.44 a   | 0.156 ± 0.06 c    | 0.316 ± 0.137 b | 4.88E-09 | 5.01E-08 |
| Triacylglycerols   | TG(20:5 34:2) | 6.82 ± 2.7 a    | 1.38 ± 0.66 c     | 3.43 ± 0.85 b   | 5.36E-09 | 5.41E-08 |
| Triacylglycerols   | TG(18:3 30:0) | 0.216 ± 0.078 c | 0.394 ± 0.163 b   | 0.968 ± 0.343 a | 5.86E-09 | 5.81E-08 |
| PC                 | PC ae C34:3   | 0.426 ± 0.078 a | 0.234 ± 0.034 c   | 0.291 ± 0.03 b  | 7.12E-09 | 6.94E-08 |
| Triacylglycerols   | TG(17:1 34:1) | 0.798 ± 0.468 b | 3.92 ± 2.15 a     | 4.97 ± 2.64 a   | 7.80E-09 | 7.48E-08 |
| Cholesterol Esters | CE(20:3)      | 3.03 ± 1.68 b   | 14 ± 6.5 a        | 12.4 ± 4.7 a    | 8.03E-09 | 7.58E-08 |
| Triacylglycerols   | TG(18:2 36:3) | 101 ± 28 a      | 22.8 ± 12.6 b     | 32.4 ± 17.7 b   | 8.97E-09 | 8.33E-08 |
| Triacylglycerols   | TG(18:1 36:6) | 1.33 ± 0.42 a   | 0.402 ± 0.158 c   | 0.837 ± 0.256 b | 9.85E-09 | 9.00E-08 |

|                    |                |                 |                 |                 |          |          |
|--------------------|----------------|-----------------|-----------------|-----------------|----------|----------|
| Triacylglycerols   | TG(22:5 34:1)  | 5.11 ± 2.25 c   | 12.7 ± 5.2 b    | 22.9 ± 7 a      | 1.05E-08 | 9.42E-08 |
| LysoPC             | lysoPC a C16:1 | 6.89 ± 1.47 c   | 14.3 ± 4.2 b    | 19.4 ± 5.8 a    | 1.12E-08 | 9.91E-08 |
| Cholesterol Esters | CE(16:1)       | 18.8 ± 5.9 c    | 40.4 ± 16.1 b   | 59.5 ± 13.7 a   | 1.17E-08 | 1.01E-07 |
| Triacylglycerols   | TG(20:3 34:0)  | 0.367 ± 0.157 b | 1.49 ± 0.79 a   | 2.02 ± 1.08 a   | 1.15E-08 | 1.01E-07 |
| Triacylglycerols   | TG(14:0 34:1)  | 2.58 ± 2.07 b   | 19.8 ± 16.5 a   | 23.9 ± 13.5 a   | 1.43E-08 | 1.21E-07 |
| Triacylglycerols   | TG(18:3 38:5)  | 0.994 ± 0.33 a  | 0.21 ± 0.074 c  | 0.399 ± 0.154 b | 1.49E-08 | 1.25E-07 |
| Triacylglycerols   | TG(18:1 33:1)  | 2.08 ± 0.91 b   | 9.02 ± 5.25 a   | 10.7 ± 5.1 a    | 1.58E-08 | 1.30E-07 |
| Triacylglycerols   | TG(16:0 36:5)  | 15.5 ± 5 a      | 4.43 ± 1.77 c   | 7.83 ± 2.67 b   | 1.84E-08 | 1.50E-07 |
| Triacylglycerols   | TG(18:0 36:4)  | 10.1 ± 3.1 a    | 2.56 ± 1.48 b   | 2.94 ± 1.29 b   | 2.21E-08 | 1.75E-07 |
| Triacylglycerols   | TG(18:1 32:1)  | 18.2 ± 14.9 b   | 135 ± 99 a      | 170 ± 108 a     | 2.20E-08 | 1.75E-07 |
| Triacylglycerols   | TG(14:0 34:0)  | 0.604 ± 0.168 b | 2.28 ± 1.82 a   | 2.67 ± 1.27 a   | 2.74E-08 | 2.11E-07 |
| Triacylglycerols   | TG(18:3 34:3)  | 2.48 ± 1.03 a   | 0.573 ± 0.194 c | 1.18 ± 0.56 b   | 2.71E-08 | 2.11E-07 |
| Triacylglycerols   | TG(16:0 36:2)  | 58.6 ± 32.8 b   | 325 ± 210 a     | 326 ± 189 a     | 2.91E-08 | 2.20E-07 |
| Triacylglycerols   | TG(18:1 31:0)  | <LOD b          | 2.32 ± 1 a      | 2.34 ± 0.74 a   | 2.93E-08 | 2.20E-07 |
| Triacylglycerols   | TG(18:2 38:5)  | 11.4 ± 3.5 a    | 2.9 ± 1.37 c    | 5.82 ± 1.68 b   | 3.20E-08 | 2.37E-07 |
| Triacylglycerols   | TG(17:1 32:1)  | 0.473 ± 0.179 b | 1.05 ± 0.62 a   | 1.6 ± 0.83 a    | 3.63E-08 | 2.65E-07 |
| Diacylglycerols    | DG(18:2 20:4)  | 0.884 ± 0.236 a | 0.207 ± 0.05 c  | 0.317 ± 0.1 b   | 3.77E-08 | 2.72E-07 |
| Triacylglycerols   | TG(14:0 32:2)  | 0.467 ± 0.199 c | 1.18 ± 1.02 b   | 3.39 ± 1.59 a   | 3.88E-08 | 2.73E-07 |
| Triacylglycerols   | TG(18:2 34:3)  | 25.4 ± 9.4 a    | 6.69 ± 2.66 c   | 13.8 ± 5.9 b    | 3.88E-08 | 2.73E-07 |
| Triacylglycerols   | TG(18:1 36:0)  | 1.41 ± 0.03 b   | 3.53 ± 2.62 a   | 2.51 ± 1.49 a   | 4.08E-08 | 2.81E-07 |
| Triacylglycerols   | TG(20:4 36:3)  | 19.6 ± 7 a      | 4.75 ± 2.38 c   | 7.88 ± 2.86 b   | 4.68E-08 | 3.18E-07 |
| Triacylglycerols   | TG(16:1 33:1)  | 0.552 ± 0.235 b | 1.48 ± 0.79 a   | 2.23 ± 1.21 a   | 4.93E-08 | 3.32E-07 |
| Triacylglycerols   | TG(14:0 35:2)  | 0.164 ± 0.019 c | 0.32 ± 0.164 b  | 0.517 ± 0.215 a | 5.39E-08 | 3.59E-07 |
| Diacylglycerols    | DG(18:1 18:1)  | 1.13 ± 0.49 b   | 4.3 ± 2.04 a    | 4.36 ± 2.25 a   | 5.50E-08 | 3.61E-07 |
| Triacylglycerols   | TG(20:1 34:1)  | 1.09 ± 0.54 b   | 5.7 ± 3.73 a    | 5.73 ± 3.64 a   | 6.10E-08 | 3.96E-07 |
| PC                 | PC aa C32:2    | 2.13 ± 0.36 b   | 1.71 ± 0.45 c   | 3.66 ± 0.88 a   | 6.74E-08 | 4.33E-07 |
| LysoPC             | lysoPC a C18:1 | 40.5 ± 6 b      | 76.4 ± 12.1 a   | 70.9 ± 17.8 a   | 6.83E-08 | 4.34E-07 |
| Triacylglycerols   | TG(18:1 32:0)  | 14.8 ± 10.3 b   | 111 ± 86 a      | 89.6 ± 59.3 a   | 6.91E-08 | 4.35E-07 |
| Triacylglycerols   | TG(20:1 32:1)  | 0.279 ± 0.171 b | 1.44 ± 0.94 a   | 2.09 ± 1.26 a   | 8.18E-08 | 5.09E-07 |
| Triacylglycerols   | TG(20:3 32:2)  | 0.428 ± 0.173 c | 0.704 ± 0.211 b | 1.45 ± 0.51 a   | 9.22E-08 | 5.68E-07 |
| Triacylglycerols   | TG(14:0 38:4)  | 0.307 ± 0.147 c | 0.602 ± 0.222 b | 1.3 ± 0.47 a    | 9.68E-08 | 5.90E-07 |

|                  |                |                 |                 |                 |          |          |
|------------------|----------------|-----------------|-----------------|-----------------|----------|----------|
| Triacylglycerols | TG(16:1 34:0)  | 1.78 ± 1.42 b   | 12 ± 9.3 a      | 14.2 ± 9.7 a    | 1.09E-07 | 6.59E-07 |
| Triacylglycerols | TG(16:1 34:1)  | 16 ± 14.2 b     | 109 ± 84 a      | 134 ± 94 a      | 1.28E-07 | 7.65E-07 |
| Triacylglycerols | TG(20:4 34:3)  | 4.78 ± 2.29 a   | 1.13 ± 0.48 c   | 2.75 ± 0.93 b   | 1.31E-07 | 7.72E-07 |
| Triacylglycerols | TG(18:2 30:0)  | 2.24 ± 1.35 c   | 5.38 ± 2.89 b   | 11.5 ± 4.6 a    | 1.40E-07 | 8.17E-07 |
| Triacylglycerols | TG(20:4 33:2)  | 0.68 ± 0.127 a  | 0.235 ± 0.109 c | 0.449 ± 0.129 b | 1.46E-07 | 8.48E-07 |
| Triacylglycerols | TG(16:0 34:1)  | 34.5 ± 23.9 b   | 246 ± 191 a     | 203 ± 142 a     | 1.64E-07 | 9.40E-07 |
| PC               | PC aa C34:4    | 2.39 ± 0.52 b   | 2.29 ± 0.52 b   | 4.66 ± 1.13 a   | 1.73E-07 | 9.48E-07 |
| PC               | PC aa C36:1    | 12.8 ± 2.5 c    | 28.9 ± 6.5 a    | 22.4 ± 7.8 b    | 1.68E-07 | 9.48E-07 |
| Triacylglycerols | TG(16:0 32:0)  | 6.75 ± 4.1 b    | 49.1 ± 40.6 a   | 30.8 ± 19.3 a   | 1.72E-07 | 9.48E-07 |
| Triacylglycerols | TG(18:3 34:2)  | 17.4 ± 5.8 a    | 5.44 ± 1.91 c   | 9.6 ± 3.91 b    | 1.70E-07 | 9.48E-07 |
| Triacylglycerols | TG(18:1 33:0)  | 0.624 ± 0.173 b | 2.5 ± 1.6 a     | 2.47 ± 1.21 a   | 1.75E-07 | 9.49E-07 |
| Triacylglycerols | TG(16:0 32:1)  | 8.27 ± 7.62 b   | 58.7 ± 51.5 a   | 70.1 ± 47.6 a   | 1.85E-07 | 9.95E-07 |
| PC               | PC ae C34:2    | 2.76 ± 0.7 a    | 1.44 ± 0.24 c   | 1.94 ± 0.27 b   | 1.96E-07 | 1.03E-06 |
| Triacylglycerols | TG(20:1 30:1)  | <LOD c          | 0.472 ± 0.199 b | 0.636 ± 0.295 a | 1.96E-07 | 1.03E-06 |
| Triacylglycerols | TG(20:3 36:4)  | 2.45 ± 0.62 a   | 0.705 ± 0.286 c | 1.27 ± 0.56 b   | 2.03E-07 | 1.06E-06 |
| Triacylglycerols | TG(16:0 34:0)  | 4.57 ± 2.47 b   | 30.2 ± 24 a     | 21.4 ± 14.1 a   | 2.34E-07 | 1.21E-06 |
| Triacylglycerols | TG(14:0 38:5)  | 0.444 ± 0.175 b | 0.517 ± 0.17 b  | 1.33 ± 0.4 a    | 2.73E-07 | 1.39E-06 |
| LysoPC           | lysoPC a C14:0 | 26.5 ± 3.2 b    | 26.3 ± 5 b      | 41.4 ± 6 a      | 2.89E-07 | 1.45E-06 |
| Triacylglycerols | TG(14:0 35:1)  | <LOD c          | 0.386 ± 0.102 b | 0.442 ± 0.136 a | 2.90E-07 | 1.45E-06 |
| Triacylglycerols | TG(18:0 32:1)  | 0.589 ± 0.368 b | 3.08 ± 2.58 a   | 3.55 ± 2.06 a   | 3.05E-07 | 1.51E-06 |
| Triacylglycerols | TG(14:0 34:2)  | 3.1 ± 2.33 c    | 11.2 ± 7.7 b    | 19.6 ± 10.4 a   | 3.41E-07 | 1.68E-06 |
| Triacylglycerols | TG(22:6 32:1)  | 1.54 ± 1.19 c   | 2.54 ± 1.04 b   | 6.82 ± 1.88 a   | 3.65E-07 | 1.78E-06 |
| Triacylglycerols | TG(18:2 38:4)  | 8.05 ± 2.19 a   | 2.57 ± 1.24 c   | 5.33 ± 1.71 b   | 4.29E-07 | 2.07E-06 |
| Triacylglycerols | TG(22:5 32:0)  | 0.749 ± 0.407 c | 1.71 ± 0.7 b    | 2.94 ± 1.15 a   | 4.45E-07 | 2.14E-06 |
| LysoPC           | lysoPC a C17:0 | 3.6 ± 0.66 a    | 2.13 ± 0.32 c   | 2.95 ± 0.52 b   | 4.76E-07 | 2.25E-06 |
| Triacylglycerols | TG(17:1 36:4)  | 0.751 ± 0.193 a | 0.239 ± 0.112 c | 0.442 ± 0.182 b | 4.75E-07 | 2.25E-06 |
| Diacylglycerols  | DG(16:0 18:1)  | 1.88 ± 0.73 b   | 6.22 ± 2.85 a   | 5.56 ± 2.88 a   | 5.27E-07 | 2.47E-06 |
| Triacylglycerols | TG(16:0 38:2)  | 1.18 ± 0.5 b    | 5.17 ± 3.37 a   | 5.07 ± 3.17 a   | 6.68E-07 | 3.08E-06 |
| Triacylglycerols | TG(16:1 32:0)  | 3.03 ± 2.86 b   | 19.1 ± 17.1 a   | 23.4 ± 17.1 a   | 7.41E-07 | 3.39E-06 |
| PC               | PC ae C38:2    | 1.05 ± 0.22 b   | 0.84 ± 0.147 c  | 1.42 ± 0.2 a    | 7.53E-07 | 3.39E-06 |
| Triacylglycerols | TG(20:4 32:2)  | 1.39 ± 0.57 b   | 0.676 ± 0.246 c | 2.07 ± 0.58 a   | 7.50E-07 | 3.39E-06 |

|                    |               |                 |                   |                 |          |          |
|--------------------|---------------|-----------------|-------------------|-----------------|----------|----------|
| Fatty Acids        | FA(18:2)      | 65.3 ± 13 a     | 44.6 b            | 47.4 ± 7.1 b    | 8.12E-07 | 3.60E-06 |
| Triacylglycerols   | TG(14:0 36:3) | 5.54 ± 2.55 c   | 9.63 ± 4.41 b     | 18.8 ± 7.1 a    | 8.13E-07 | 3.60E-06 |
| PC                 | PC aa C38:3   | 10.3 ± 1.9 b    | 20.9 ± 6 a        | 21.9 ± 7.9 a    | 1.09E-06 | 4.67E-06 |
| Triacylglycerols   | TG(14:0 34:3) | 0.946 ± 0.687 c | 1.8 ± 0.83 b      | 4.45 ± 2.25 a   | 1.08E-06 | 4.67E-06 |
| Triacylglycerols   | TG(16:1 36:1) | 1.62 ± 1.17 b   | 7.61 ± 4.73 a     | 10.2 ± 7.9 a    | 1.09E-06 | 4.67E-06 |
| Triacylglycerols   | TG(16:1 36:2) | 9.16 ± 7.09 b   | 39.1 ± 23.5 a     | 56.4 ± 43 a     | 1.09E-06 | 4.67E-06 |
| Triacylglycerols   | TG(17:0 34:1) | 0.598 ± 0.152 b | 2.23 ± 1.4 a      | 2.18 ± 1.11 a   | 1.07E-06 | 4.67E-06 |
| Triacylglycerols   | TG(16:0 35:2) | 1.2 ± 0.53 b    | 3.71 ± 1.94 a     | 4.77 ± 2.63 a   | 1.11E-06 | 4.72E-06 |
| Triacylglycerols   | TG(16:0 32:2) | 4.46 ± 3.36 b   | 19.5 ± 15.9 a     | 29.1 ± 18.7 a   | 1.20E-06 | 5.06E-06 |
| PC                 | PC ae C34:1   | 2.31 ± 0.28 b   | 3.32 ± 0.42 a     | 3.4 ± 0.57 a    | 1.26E-06 | 5.26E-06 |
| Triacylglycerols   | TG(16:0 32:3) | 0.602 ± 0.378 c | 1.28 ± 0.53 b     | 2.44 ± 1.21 a   | 1.48E-06 | 6.14E-06 |
| Triacylglycerols   | TG(20:4 35:3) | 0.276 ± 0.096 a | 0.0888 ± 0.0467 c | 0.143 ± 0.039 b | 1.50E-06 | 6.19E-06 |
| SM                 | SM C24:1      | 14.3 ± 1.6 b    | 19.5 ± 1.8 a      | 18.1 ± 2 a      | 1.54E-06 | 6.32E-06 |
| Triacylglycerols   | TG(18:1 36:4) | 62.9 ± 17.9 a   | 20.7 ± 10.1 b     | 29.6 ± 15.6 b   | 1.62E-06 | 6.60E-06 |
| Triacylglycerols   | TG(18:1 32:2) | 6.95 ± 4.25 c   | 19.4 ± 11 b       | 33.5 ± 19.4 a   | 1.66E-06 | 6.72E-06 |
| Triacylglycerols   | TG(18:2 34:2) | 161 ± 44 a      | 62.5 ± 28.1 c     | 105 ± 39 b      | 1.70E-06 | 6.81E-06 |
| Triacylglycerols   | TG(16:0 33:1) | 0.902 ± 0.367 b | 3.78 ± 2.41 a     | 3.68 ± 1.85 a   | 1.75E-06 | 6.96E-06 |
| Triacylglycerols   | TG(16:0 38:7) | 2.46 ± 0.85 a   | 0.991 ± 0.359 b   | 2.15 ± 0.6 a    | 1.84E-06 | 7.27E-06 |
| Cholesterol Esters | CE(22:5)      | 2.01 ± 0.69 b   | 4.69 ± 1.65 a     | 4.91 ± 1.76 a   | 2.08E-06 | 8.17E-06 |
| PC                 | PC ae C32:1   | 0.629 ± 0.078 c | 0.782 ± 0.069 b   | 0.928 ± 0.167 a | 2.22E-06 | 8.64E-06 |
| Triacylglycerols   | TG(16:1 32:1) | 4.36 ± 3.81 b   | 26.3 ± 25.1 a     | 39.1 ± 28.6 a   | 2.26E-06 | 8.76E-06 |
| Triacylglycerols   | TG(16:1 36:5) | 1.43 ± 0.67 a   | 0.469 ± 0.165 b   | 1.18 ± 0.51 a   | 2.66E-06 | 1.02E-05 |
| Triacylglycerols   | TG(18:1 38:7) | 1.89 ± 0.72 a   | 0.689 ± 0.248 b   | 1.4 ± 0.47 a    | 3.10E-06 | 1.19E-05 |
| Triacylglycerols   | TG(14:0 36:4) | 3.59 ± 1.14 a   | 1.94 ± 0.79 b     | 4.74 ± 1.51 a   | 3.41E-06 | 1.30E-05 |
| PC                 | PC ae C36:2   | 3.4 ± 0.81 a    | 2.06 ± 0.33 b     | 3.25 ± 0.57 a   | 3.52E-06 | 1.33E-05 |
| Triacylglycerols   | TG(20:4 32:1) | 2.66 ± 1.75 c   | 3.67 ± 1.18 b     | 9.08 ± 3.55 a   | 3.59E-06 | 1.35E-05 |
| Triacylglycerols   | TG(18:2 35:2) | 1.74 ± 0.41 a   | 0.688 ± 0.371 c   | 1.23 ± 0.5 b    | 3.76E-06 | 1.40E-05 |
| Triacylglycerols   | TG(20:4 34:2) | 35.7 ± 12.5 a   | 12.2 ± 5.9 c      | 24.5 ± 8.2 b    | 3.77E-06 | 1.40E-05 |
| Triacylglycerols   | TG(16:0 36:4) | 102 ± 28 a      | 42 ± 19.7 c       | 64.3 ± 21.3 b   | 4.29E-06 | 1.58E-05 |
| Triacylglycerols   | TG(22:6 34:3) | 2.35 ± 1.21 a   | 0.673 ± 0.354 b   | 1.88 ± 0.55 a   | 4.72E-06 | 1.72E-05 |
| Triacylglycerols   | TG(16:1 32:2) | 1.13 ± 0.91 c   | 3.67 ± 2.78 b     | 7.23 ± 4.98 a   | 5.04E-06 | 1.83E-05 |

|                  |               |                  |                   |                   |          |          |
|------------------|---------------|------------------|-------------------|-------------------|----------|----------|
| Diacylglycerols  | DG(16:0 16:1) | 0.414 ± 0.202 b  | 1.12 ± 0.58 a     | 1.39 ± 0.72 a     | 5.27E-06 | 1.90E-05 |
| Triacylglycerols | TG(16:0 28:2) | 0.184 ± 0.062 c  | 0.377 ± 0.195 b   | 0.674 ± 0.313 a   | 5.31E-06 | 1.91E-05 |
| Triacylglycerols | TG(20:2 34:1) | 1.64 ± 0.79 b    | 4.43 ± 2.47 a     | 5.77 ± 2.86 a     | 5.75E-06 | 2.05E-05 |
| Triacylglycerols | TG(18:1 36:1) | 8.74 ± 4.8 b     | 39.4 ± 28.2 a     | 36.2 ± 27.9 a     | 6.32E-06 | 2.24E-05 |
| Diacylglycerols  | DG(18:2 18:3) | 1.16 ± 0.24 a    | 0.329 ± 0.063 b   | 0.363 ± 0.089 b   | 6.45E-06 | 2.26E-05 |
| Triacylglycerols | TG(16:0 35:1) | 0.63 ± 0.149 b   | 2.32 ± 1.43 a     | 2.19 ± 1.14 a     | 6.44E-06 | 2.26E-05 |
| PC               | PC ae C36:1   | 0.922 ± 0.147 c  | 1.19 ± 0.15 b     | 1.41 ± 0.25 a     | 7.69E-06 | 2.68E-05 |
| Triacylglycerols | TG(20:2 32:1) | 0.452 ± 0.306 c  | 1.21 ± 0.81 b     | 1.92 ± 0.95 a     | 9.24E-06 | 3.20E-05 |
| Triacylglycerols | TG(16:0 36:6) | 1.16 ± 0.53 a    | 0.472 ± 0.151 b   | 0.94 ± 0.301 a    | 9.61E-06 | 3.31E-05 |
| Triacylglycerols | TG(18:0 38:6) | 1.34 ± 0.42 a    | 0.502 ± 0.242 c   | 0.7 ± 0.273 b     | 9.94E-06 | 3.40E-05 |
| PC               | PC aa C40:5   | 6.59 ± 1.33 b    | 12.6 ± 2.8 a      | 13.4 ± 6 a        | 1.15E-05 | 3.90E-05 |
| Triacylglycerols | TG(18:1 36:2) | 40 ± 19.9 b      | 160 ± 110 a       | 168 ± 136 a       | 1.23E-05 | 4.15E-05 |
| Triacylglycerols | TG(22:5 34:3) | 1.42 ± 0.57 a    | 0.739 ± 0.277 b   | 1.93 ± 0.49 a     | 1.38E-05 | 4.64E-05 |
| Triacylglycerols | TG(22:6 34:2) | 18 ± 7.6 a       | 6.95 ± 3.43 b     | 17.3 ± 4.6 a      | 1.49E-05 | 4.99E-05 |
| Triacylglycerols | TG(16:0 38:1) | 0.3 ± 0.123 b    | 1.26 ± 0.92 a     | 0.918 ± 0.584 a   | 1.68E-05 | 5.60E-05 |
| Triacylglycerols | TG(20:0 32:4) | 0.82 ± 0.266 a   | 0.349 ± 0.124 c   | 0.545 ± 0.196 b   | 1.75E-05 | 5.79E-05 |
| Triacylglycerols | TG(16:0 40:8) | 4.21 ± 1.75 a    | 1.57 ± 0.75 b     | 3.51 ± 1 a        | 1.79E-05 | 5.88E-05 |
| SM               | SM C18:0      | 1.7 ± 0.3 c      | 2.67 ± 0.32 a     | 2.29 ± 0.57 b     | 1.81E-05 | 5.91E-05 |
| Triacylglycerols | TG(22:6 34:1) | 9.84 ± 5.2 b     | 13.1 ± 6.1 b      | 26.2 ± 6 a        | 2.14E-05 | 6.95E-05 |
| SM               | SM C20:2      | 0.076 ± 0.0275 a | 0.0529 ± 0.0276 b | 0.0253 ± 0.0125 c | 2.44E-05 | 7.88E-05 |
| Triacylglycerols | TG(16:0 34:2) | 57.7 ± 38.3 b    | 182 ± 112 a       | 212 ± 132 a       | 2.64E-05 | 8.49E-05 |
| Triacylglycerols | TG(16:1 36:4) | 9.39 ± 4.1 a     | 3.74 ± 1.45 b     | 8.34 ± 3.83 a     | 2.87E-05 | 9.18E-05 |
| Triacylglycerols | TG(18:2 32:1) | 19.2 ± 12.4 c    | 34 ± 14.2 b       | 62.2 ± 31.3 a     | 3.09E-05 | 9.77E-05 |
| Triacylglycerols | TG(18:0 32:2) | 0.516 ± 0.274 c  | 1.09 ± 0.75 b     | 1.75 ± 0.77 a     | 3.12E-05 | 9.83E-05 |
| Triacylglycerols | TG(20:1 34:0) | 0.194 ± 0.077 b  | 0.678 ± 0.449 a   | 0.584 ± 0.344 a   | 3.15E-05 | 9.84E-05 |
| Triacylglycerols | TG(18:2 32:2) | 7.43 ± 2.75 b    | 4.38 ± 1.62 c     | 10.6 ± 4.4 a      | 3.28E-05 | 1.02E-04 |
| Triacylglycerols | TG(20:2 32:0) | 0.24 ± 0.122 b   | 0.641 ± 0.335 a   | 0.73 ± 0.392 a    | 3.63E-05 | 1.12E-04 |
| PC               | PC ae C40:4   | 1.69 ± 0.21 b    | 1.48 ± 0.19 b     | 2.23 ± 0.45 a     | 3.71E-05 | 1.14E-04 |
| PC               | PC aa C36:6   | 0.52 ± 0.128 b   | 0.47 ± 0.116 b    | 0.823 ± 0.21 a    | 4.31E-05 | 1.31E-04 |
| PC               | PC ae C34:0   | 0.554 ± 0.087 b  | 0.511 ± 0.051 b   | 0.718 ± 0.117 a   | 4.31E-05 | 1.31E-04 |
| Triacylglycerols | TG(16:0 38:6) | 9.42 ± 3.55 a    | 3.99 ± 1.74 b     | 7.71 ± 2.4 a      | 4.33E-05 | 1.31E-04 |



|                    |               |                 |                   |                  |          |          |
|--------------------|---------------|-----------------|-------------------|------------------|----------|----------|
| PC                 | PC aa C42:4   | 0.18 ± 0.021 a  | 0.126 ± 0.014 b   | 0.162 ± 0.03 a   | 4.47E-05 | 1.35E-04 |
| Triacylglycerols   | TG(16:1 34:2) | 19 ± 15.2 b     | 45.7 ± 23.4 a     | 76.6 ± 50.4 a    | 4.58E-05 | 1.37E-04 |
| Triacylglycerols   | TG(22:6 32:0) | 1.4 ± 0.83 c    | 2.44 ± 1.01 b     | 3.77 ± 1.54 a    | 5.05E-05 | 1.51E-04 |
| Triacylglycerols   | TG(16:1 38:4) | 0.994 ± 0.626 b | 1.3 ± 0.4 b       | 2.98 ± 1.61 a    | 5.52E-05 | 1.64E-04 |
| Cholesterol Esters | CE(17:1)      | 0.988 ± 0.229 c | 1.32 ± 0.42 b     | 1.84 ± 0.48 a    | 5.96E-05 | 1.76E-04 |
| Triacylglycerols   | TG(20:3 34:2) | 4.69 ± 1.98 c   | 6.75 ± 2.3 b      | 11.5 ± 4.7 a     | 6.55E-05 | 1.93E-04 |
| Triacylglycerols   | TG(18:0 32:0) | 1.19 ± 0.32 b   | 4.76 ± 3.92 a     | 2.51 ± 1.19 a    | 7.39E-05 | 2.15E-04 |
| Triacylglycerols   | TG(22:5 34:2) | 8.95 ± 3.22 b   | 7 ± 3.06 b        | 16 ± 4.1 a       | 7.69E-05 | 2.23E-04 |
| PC                 | PC ae C38:3   | 0.727 ± 0.159 c | 0.851 ± 0.125 b   | 1.09 ± 0.19 a    | 7.79E-05 | 2.24E-04 |
| PC                 | PC ae C38:4   | 6.36 ± 0.95 a   | 4.46 ± 0.66 b     | 5.81 ± 1.01 a    | 9.48E-05 | 2.71E-04 |
| Triacylglycerols   | TG(20:1 32:2) | 0.332 ± 0.097 c | 0.548 ± 0.258 b   | 1.03 ± 0.53 a    | 1.01E-04 | 2.87E-04 |
| Triacylglycerols   | TG(18:3 35:2) | 0.304 ± 0.106 a | 0.104 ± 0.042 c   | 0.187 ± 0.097 b  | 1.08E-04 | 3.04E-04 |
| Triacylglycerols   | TG(17:1 34:2) | 0.996 ± 0.451 c | 1.6 ± 0.67 b      | 2.68 ± 1.33 a    | 1.08E-04 | 3.05E-04 |
| Triacylglycerols   | TG(22:4 32:0) | 0.474 ± 0.258 c | 0.795 ± 0.311 b   | 1.42 ± 0.6 a     | 1.13E-04 | 3.14E-04 |
| Triacylglycerols   | TG(18:1 35:2) | 1.22 ± 0.43 b   | 2.46 ± 1.28 a     | 3.47 ± 2.06 a    | 1.15E-04 | 3.20E-04 |
| PC                 | PC ae C38:1   | 0.141 ± 0.053 b | 0.25 ± 0.11 a     | 0.329 ± 0.101 a  | 1.33E-04 | 3.66E-04 |
| Triacylglycerols   | TG(20:5 36:2) | 2.33 ± 1.09 a   | 0.938 ± 0.36 b    | 1.71 ± 0.66 a    | 1.37E-04 | 3.77E-04 |
| Acylcarnitines     | C12           | <LOD b          | 0.0747 ± 0.0012 b | 0.0809 ± 0.007 a | 1.40E-04 | 3.83E-04 |
| Triacylglycerols   | TG(22:4 34:2) | 6.88 ± 2.55 a   | 3.15 ± 1.36 b     | 6.71 ± 2.16 a    | 1.65E-04 | 4.48E-04 |
| Triacylglycerols   | TG(16:0 38:4) | 4.4 ± 2.07 c    | 6.86 ± 2.6 b      | 11 ± 5 a         | 1.66E-04 | 4.50E-04 |
| Triacylglycerols   | TG(18:1 34:2) | 125 ± 57 b      | 242 ± 119 a       | 325 ± 171 a      | 1.74E-04 | 4.69E-04 |
| Triacylglycerols   | TG(18:3 32:1) | 1.57 ± 1.02 b   | 2.19 ± 0.84 b     | 4.3 ± 2.18 a     | 1.94E-04 | 5.22E-04 |
| Triacylglycerols   | TG(16:0 38:3) | 3.19 ± 1.34 b   | 6.07 ± 3.02 a     | 8.32 ± 4.12 a    | 2.05E-04 | 5.46E-04 |
| Triacylglycerols   | TG(18:1 32:3) | 0.782 ± 0.365 b | 1.13 ± 0.5 b      | 2.1 ± 1.14 a     | 2.12E-04 | 5.63E-04 |
| Triacylglycerols   | TG(22:4 32:2) | 0.363 ± 0.153 b | 0.232 ± 0.064 c   | 0.564 ± 0.185 a  | 2.54E-04 | 6.72E-04 |
| Fatty Acids        | DHA           | 14 ± 4.8 a      | 7.29 ± 2.14 c     | 9.64 ± 1.95 b    | 2.76E-04 | 7.26E-04 |
| PC                 | PC ae C40:6   | 1.56 ± 0.21 a   | 1.09 ± 0.14 b     | 1.39 ± 0.29 a    | 2.82E-04 | 7.40E-04 |
| Triacylglycerols   | TG(16:0 34:3) | 20 ± 14.7 b     | 33.4 ± 13.4 a     | 57.9 ± 33.6 a    | 2.95E-04 | 7.71E-04 |
| Triacylglycerols   | TG(18:1 38:6) | 7.2 ± 2.84 a    | 3.89 ± 1.67 b     | 7.55 ± 2.26 a    | 3.34E-04 | 8.68E-04 |
| PC                 | PC ae C40:3   | 0.314 ± 0.058 b | 0.394 ± 0.065 a   | 0.466 ± 0.1 a    | 3.53E-04 | 9.15E-04 |
| Triacylglycerols   | TG(16:1 38:5) | 1.49 ± 0.8 b    | 1.32 ± 0.45 b     | 3.23 ± 1.52 a    | 3.95E-04 | 1.02E-03 |

|                    |                    |                 |                 |                 |          |          |
|--------------------|--------------------|-----------------|-----------------|-----------------|----------|----------|
| Triacylglycerols   | TG(20:5 34:0)      | 0.649 ± 0.258 b | 0.451 ± 0.163 c | 0.856 ± 0.216 a | 4.09E-04 | 1.05E-03 |
| PC                 | PC aa C40:2        | 0.247 ± 0.035 a | 0.175 ± 0.036 c | 0.207 ± 0.035 b | 5.09E-04 | 1.29E-03 |
| Triacylglycerols   | TG(16:0 40:7)      | 6.44 ± 2.5 b    | 4.81 ± 2.33 b   | 9.75 ± 2.34 a   | 5.46E-04 | 1.38E-03 |
| Cholesterol Esters | CE(15:0)           | 3.37 ± 0.81 b   | 2.78 ± 0.84 b   | 4.28 ± 0.74 a   | 5.82E-04 | 1.47E-03 |
| Triacylglycerols   | TG(16:0 40:6)      | 6.55 ± 2.44 b   | 5.22 ± 2.1 b    | 10.5 ± 2.7 a    | 5.89E-04 | 1.48E-03 |
| Triacylglycerols   | TG(16:1 38:3)      | 0.619 ± 0.32 b  | 0.964 ± 0.428 b | 1.86 ± 1.24 a   | 6.12E-04 | 1.53E-03 |
| Triacylglycerols   | TG(20:5 34:1)      | 4.06 ± 1.68 a   | 2.66 ± 1.02 b   | 5.17 ± 1.29 a   | 6.65E-04 | 1.66E-03 |
| PC                 | PC aa C40:3        | 0.248 ± 0.051 b | 0.347 ± 0.068 a | 0.351 ± 0.072 a | 6.91E-04 | 1.71E-03 |
| Triacylglycerols   | TG(18:0 38:7)      | 0.496 ± 0.164 a | 0.246 ± 0.094 b | 0.317 ± 0.101 b | 7.84E-04 | 1.94E-03 |
| Triacylglycerols   | TG(16:0 37:3)      | 0.175 ± 0.069 b | 0.245 ± 0.112 b | 0.367 ± 0.135 a | 8.18E-04 | 2.01E-03 |
| PC                 | PC aa C34:3        | 6.47 ± 0.82 a   | 4.7 ± 1.05 b    | 6.92 ± 2.06 a   | 8.31E-04 | 2.03E-03 |
| Aminoacids Related | Betaine            | 69.9 ± 16.4 a   | 49.9 ± 9.6 b    | 50.3 ± 8.9 b    | 1.01E-03 | 2.45E-03 |
| Ceramides          | Cer(d18:1/24:1)    | 0.697 ± 0.192 b | 1.09 ± 0.18 a   | 1.12 ± 0.47 a   | 1.22E-03 | 2.95E-03 |
| Triacylglycerols   | TG(17:0 34:3)      | 0.237 ± 0.081 b | 0.263 ± 0.091 b | 0.507 ± 0.268 a | 1.23E-03 | 2.96E-03 |
| Triacylglycerols   | TG(17:2 36:3)      | 0.405 ± 0.09 a  | 0.211 ± 0.052 b | 0.252 ± 0.106 b | 1.24E-03 | 2.97E-03 |
| Triacylglycerols   | TG(16:0 35:3)      | 0.829 ± 0.373 b | 1.12 ± 0.49 b   | 1.76 ± 0.77 a   | 1.26E-03 | 3.00E-03 |
| Cholesterol Esters | CE(17:0)           | 2.07 ± 0.68 a   | 1.56 ± 0.52 b   | 2.52 ± 0.49 a   | 1.47E-03 | 3.48E-03 |
| Triacylglycerols   | TG(16:1 34:3)      | 3.84 ± 3.3 b    | 5.09 ± 2.16 b   | 11.1 ± 7.7 a    | 1.54E-03 | 3.66E-03 |
| PC                 | PC ae C38:6        | 1.69 ± 0.26 a   | 1.27 ± 0.16 b   | 1.51 ± 0.26 a   | 1.56E-03 | 3.67E-03 |
| Triacylglycerols   | TG(20:3 34:3)      | 1.26 ± 0.57 b   | 0.917 ± 0.289 b | 1.92 ± 0.86 a   | 1.72E-03 | 4.03E-03 |
| Triacylglycerols   | TG(20:2 34:3)      | 0.688 ± 0.309 a | 0.372 ± 0.117 b | 0.835 ± 0.451 a | 1.80E-03 | 4.20E-03 |
| Triacylglycerols   | TG(16:0 34:4)      | 1.57 ± 0.99 b   | 1.73 ± 0.6 b    | 3.47 ± 1.92 a   | 1.82E-03 | 4.23E-03 |
| Triacylglycerols   | TG(16:0 38:5)      | 7.59 ± 3.23 b   | 7.71 ± 3.19 b   | 13.8 ± 5 a      | 1.92E-03 | 4.44E-03 |
| Triacylglycerols   | TG(20:1 34:2)      | 1.78 ± 0.76 b   | 2.98 ± 1.52 a   | 4.24 ± 2.51 a   | 1.93E-03 | 4.44E-03 |
| Triacylglycerols   | TG(18:1 33:2)      | 1.81 ± 0.48 b   | 2.31 ± 1.14 b   | 3.35 ± 1.31 a   | 2.37E-03 | 5.43E-03 |
| HexCer             | HexCer(d18:1/24:1) | 0.96 ± 0.292 b  | 1.39 ± 0.26 a   | 1.34 ± 0.36 a   | 2.49E-03 | 5.69E-03 |
| Triacylglycerols   | TG(16:0 36:3)      | 130 ± 55 b      | 192 ± 94 a      | 254 ± 105 a     | 2.61E-03 | 5.94E-03 |
| SM                 | SM C26:1           | 0.219 ± 0.035 b | 0.263 ± 0.046 a | 0.297 ± 0.049 a | 2.62E-03 | 5.94E-03 |
| Triacylglycerols   | TG(20:4 32:0)      | 3.21 ± 1.53 b   | 5.39 ± 2.91 a   | 6.39 ± 2.67 a   | 2.95E-03 | 6.67E-03 |
| Triacylglycerols   | TG(16:1 36:3)      | 15.5 ± 9.1 b    | 18.7 ± 8 b      | 36 ± 23.2 a     | 3.21E-03 | 7.18E-03 |
| Triacylglycerols   | TG(18:0 36:1)      | 0.79 ± 0.28 b   | 2.19 ± 1.72 a   | 1.47 ± 1.00 a   | 3.27E-03 | 7.30E-03 |

|                     |                |                   |                   |                  |          |          |
|---------------------|----------------|-------------------|-------------------|------------------|----------|----------|
| Fatty Acids         | AA             | 29.8 ± 8.1 a      | 20.1 ± 6.6 b      | 21.7 ± 3.6 b     | 3.49E-03 | 7.73E-03 |
| SM                  | SM C18:1       | 0.762 ± 0.096 b   | 0.945 ± 0.099 a   | 0.892 ± 0.145 a  | 3.66E-03 | 8.08E-03 |
| Triacylglycerols    | TG(18:3 36:2)  | 7.87 ± 2.75 a     | 3.89 ± 1.95 b     | 5.19 ± 3.39 b    | 3.89E-03 | 8.55E-03 |
| Diacylglycerols     | DG(16:1 18:2)  | 0.9 ± 0.508 b     | 0.963 ± 0.221 b   | 1.68 ± 0.81 a    | 3.91E-03 | 8.57E-03 |
| PC                  | PC aa C34:2    | 154 ± 26 a        | 118 ± 16 b        | 140 ± 25 a       | 3.98E-03 | 8.66E-03 |
| Triacylglycerols    | TG(17:0 34:2)  | 0.919 ± 0.33 b    | 1.41 ± 0.71 a     | 1.88 ± 0.93 a    | 3.98E-03 | 8.66E-03 |
| Cholesterol Esters  | CE(20:5)       | 12.3 ± 2.3 b      | 14.8 ± 5.1 b      | 18 ± 3.4 a       | 4.19E-03 | 9.07E-03 |
| Triacylglycerols    | TG(20:4 34:1)  | 19.4 ± 8.1 b      | 21.5 ± 9.5 b      | 35.4 ± 13.6 a    | 4.44E-03 | 9.58E-03 |
| Triacylglycerols    | TG(18:1 38:5)  | 6.68 ± 2.48 b     | 6.46 ± 2.58 b     | 11.6 ± 4.8 a     | 4.85E-03 | 1.04E-02 |
| Diacylglycerols     | DG(18:1 18:3)  | 0.505 ± 0.109 a   | 0.361 ± 0.098 b   | 0.379 ± 0.095 b  | 4.98E-03 | 1.07E-02 |
| Diacylglycerols     | DG(16:1 18:1)  | 2.22 ± 1.28 b     | 3.07 ± 1.53 a     | 3.42 ± 1.72 a    | 5.15E-03 | 1.10E-02 |
| Cholesterol Esters  | CE(20:0)       | 0.839 ± 0.204 a   | 0.735 ± 0.136 b   | 0.747 ± 0.173 a  | 5.35E-03 | 1.14E-02 |
| Triacylglycerols    | TG(20:4 34:0)  | 2.8 ± 1.17 b      | 3.77 ± 1.78 ab    | 5.19 ± 2.02 a    | 5.72E-03 | 1.21E-02 |
| Triacylglycerols    | TG(20:0 32:3)  | 0.413 ± 0.122 b   | 0.523 ± 0.202 b   | 0.718 ± 0.279 a  | 5.84E-03 | 1.23E-02 |
| Triacylglycerols    | TG(18:2 34:1)  | 118 ± 48 b        | 170 ± 85 ab       | 219 ± 93 a       | 5.87E-03 | 1.24E-02 |
| Indoles Derivatives | 3-IPA          | 0.967 ± 0.358 a   | 0.62 ± 0.236 b    | 0.574 ± 0.136 b  | 5.98E-03 | 1.25E-02 |
| Diacylglycerols     | DG(18:1 20:3)  | 0.121 ± 0.037 b   | 0.168 ± 0.033 a   | 0.208 ± 0.084 a  | 6.40E-03 | 1.34E-02 |
| Triacylglycerols    | TG(18:3 36:1)  | 1.91 ± 0.62 a     | 1.09 ± 0.53 b     | 1.18 ± 0.61 b    | 6.77E-03 | 1.41E-02 |
| PC                  | PC aa C38:5    | 38.8 ± 6.4 b      | 44.9 ± 8.2 ab     | 56.5 ± 17.4 a    | 7.19E-03 | 1.49E-02 |
| SM                  | SM (OH) C24:1  | 0.967 ± 0.123 b   | 0.982 ± 0.108 b   | 1.16 ± 0.16 a    | 7.62E-03 | 1.58E-02 |
| Triacylglycerols    | TG(18:0 36:2)  | 4.07 ± 1.93 b     | 10.4 ± 8 a        | 7.75 ± 5.49 a    | 7.82E-03 | 1.61E-02 |
| Triacylglycerols    | TG(17:2 38:7)  | 0.0678 ± 0.0173 a | 0.0643 ± 0.0262 b | 0.059 ± 0.0104 b | 8.52E-03 | 1.75E-02 |
| Triacylglycerols    | TG(17:1 34:3)  | 0.284 ± 0.102 b   | 0.255 ± 0.078 b   | 0.543 ± 0.291 a  | 9.00E-03 | 1.84E-02 |
| Triacylglycerols    | TG(16:0 33:2)  | 1.11 ± 0.38 b     | 1.77 ± 0.93 a     | 2.24 ± 1.12 a    | 9.05E-03 | 1.84E-02 |
| Triacylglycerols    | TG(17:2 34:2)  | 0.377 ± 0.113 a   | 0.242 ± 0.08 b    | 0.357 ± 0.114 a  | 9.49E-03 | 1.93E-02 |
| Triacylglycerols    | TG(18:1 35:3)  | 0.808 ± 0.291 b   | 0.794 ± 0.294 b   | 1.33 ± 0.67 a    | 9.66E-03 | 1.96E-02 |
| Triacylglycerols    | TG(18:2 32:0)  | 22.5 ± 11.4 b     | 39 ± 21.3 a       | 43.4 ± 22.5 a    | 9.72E-03 | 1.96E-02 |
| Cholesterol Esters  | CE(15:1)       | 0.536 ± 0.118 b   | 0.551 ± 0.163 b   | 0.709 ± 0.119 a  | 1.13E-02 | 2.26E-02 |
| Diacylglycerols     | DG(18:1 20:2)  | 0.147 ± 0.035 b   | 0.149 ± 0.026 a   | 0.186 ± 0.054 a  | 1.20E-02 | 2.37E-02 |
| Triacylglycerols    | TG(18:1 33:3)  | 0.326 ± 0.097 ab  | 0.257 ± 0.102 b   | 0.416 ± 0.162 a  | 1.28E-02 | 2.50E-02 |
| LysoPC              | lysoPC a C26:1 | 0.777 ± 0.101 a   | 0.967 ± 0.361 a   | 0.895 ± 0.228 b  | 1.30E-02 | 2.55E-02 |

|                    |                    |                 |                  |                 |          |          |
|--------------------|--------------------|-----------------|------------------|-----------------|----------|----------|
| Diacylglycerols    | DG(14:0 18:1)      | <LOD b          | 0.916 ± 0.131 ab | 0.904 ± 0.304 a | 1.34E-02 | 2.61E-02 |
| SM                 | SM (OH) C22:1      | 5.03 ± 0.43 a   | 4.29 ± 0.47 b    | 4.66 ± 0.62 ab  | 1.45E-02 | 2.82E-02 |
| Triacylglycerols   | TG(18:2 33:1)      | 2.5 ± 0.79 b    | 2.5 ± 1.16 b     | 3.75 ± 1.3 a    | 1.47E-02 | 2.85E-02 |
| Triacylglycerols   | TG(17:1 36:3)      | 0.869 ± 0.342 b | 0.755 ± 0.328 b  | 1.35 ± 0.69 a   | 1.51E-02 | 2.92E-02 |
| PC                 | PC aa C36:5        | 5.95 ± 1.1 ab   | 5.09 ± 1.1 b     | 7.09 ± 2 a      | 1.52E-02 | 2.93E-02 |
| Fatty Acids        | FA(20:3)           | 1.47 ± 0.38 a   | 0.968 ± 0.354 b  | 1.34 ± 0.44 a   | 1.56E-02 | 3.00E-02 |
| LysoPC             | lysoPC a C18:2     | 111 ± 21 a      | 86.1 ± 14.7 b    | 96.1 ± 18.7 ab  | 1.59E-02 | 3.03E-02 |
| PC                 | PC aa C36:3        | 33 ± 5.9 b      | 38.4 ± 8.3 ab    | 44.9 ± 11.9 a   | 1.68E-02 | 3.20E-02 |
| Triacylglycerols   | TG(18:1 34:4)      | 2.09 ± 1.08 ab  | 1.54 ± 0.53 b    | 3.02 ± 1.7 a    | 1.70E-02 | 3.21E-02 |
| Cholesterol Esters | CE(18:2)           | 212 ± 59 a      | 148 ± 55 b       | 174 ± 44 ab     | 1.77E-02 | 3.35E-02 |
| Triacylglycerols   | TG(20:1 34:3)      | 0.526 ± 0.258 b | 0.504 ± 0.235 b  | 0.995 ± 0.634 a | 1.84E-02 | 3.45E-02 |
| Triacylglycerols   | TG(18:1 34:3)      | 24.4 ± 13.2 b   | 26.9 ± 11.7 b    | 46.6 ± 28.9 a   | 1.90E-02 | 3.55E-02 |
| Triacylglycerols   | TG(20:1 32:3)      | 0.213 ± 0.072 a | 0.176 ± 0.048 b  | 0.271 ± 0.124 a | 1.90E-02 | 3.55E-02 |
| Ceramides          | Cer(d18:1/22:0)    | 0.591 ± 0.169 a | 0.468 ± 0.073 ab | 0.416 ± 0.188 b | 2.18E-02 | 4.04E-02 |
| PC                 | PC ae C40:5        | 1.11 ± 0.17 ab  | 1.03 ± 0.14 b    | 1.27 ± 0.21 a   | 2.23E-02 | 4.11E-02 |
| Cholesterol Esters | CE(18:1)           | 51.8 ± 14.6 b   | 74.4 ± 28.5 a    | 67.4 ± 17.4 a   | 2.32E-02 | 4.27E-02 |
| Triacylglycerols   | TG(20:4 36:2)      | 11.3 ± 4.3 a    | 7.11 ± 3.3 b     | 11.1 ± 5.3 a    | 2.38E-02 | 4.37E-02 |
| Aminoacids Related | Ornithine          | 67.1 ± 10 a     | 54.6 ± 6.2 b     | 65.4 ± 14.5 a   | 2.55E-02 | 4.65E-02 |
| HexCer             | HexCer(d18:1/22:0) | 1.07 ± 0.26 a   | 0.935 ± 0.207 ab | 0.788 ± 0.2 b   | 2.59E-02 | 4.73E-02 |

Data are means ± SD for n = 10 rats/group. Means not sharing the same lowercase letter (a, b) differ across groups,  $P < 0.05$ .

Abbreviations: LOD, limit of detection.
